# Supplementary material
Source: Springer Nature journal article supplement (https://www.springermedizin.de/resource/supplementary/12935_2010_262_MOESM3_ESM.pdf/9540174)

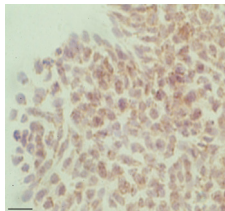

**DAY 0**

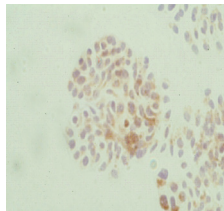

**DAY 1**

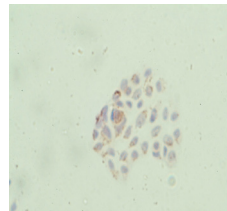

**DAY 2**

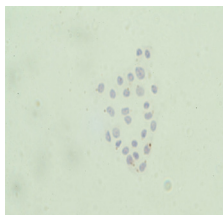

**DAY 3**

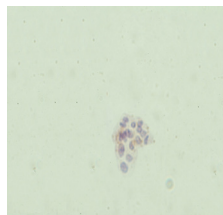

**DAY 4**

Supplement: MOESM3 [file 9540174]
